# Supplementary material
Source: Springer Nature journal article supplement (https://www.springermedizin.de/resource/supplementary/12884_2011_461_MOESM3_ESM.pdf/9457956)

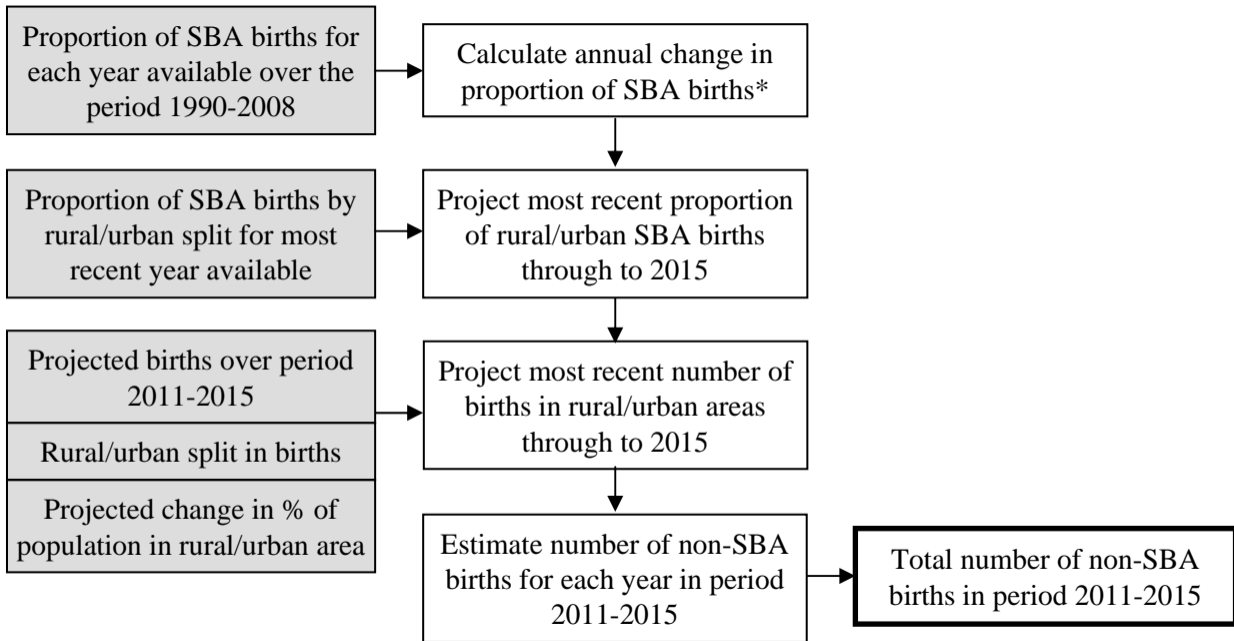

Supplement: MOESM3 [file 9457956]
